# Supplementary material for: Human Adipose Tissue-Derived Mesenchymal Stromal Cells Inhibit CD4+ T Cell Proliferation and Induce Regulatory T Cells as Well as CD127 Expression on CD4+CD25+ T Cells
Source: MDPI journal article supplement (doi:10.3390/cells10010058), 2021-01-01
Supplement: s1 [file s1]

## Supplementary Figures and Tables

**Table S1.** Percentages of CD4+CD25+ cells within the Live population.

| Culture condition                |           | %CD4+CD25+<br>of Live |
|----------------------------------|-----------|-----------------------|
| Not stimulated<br>PBMC           | Direct    | 5.73 ± 1.15           |
|                                  | Transwell | 7.85 ± 2.02           |
| Not stimulated<br>ASC cocultures | Direct    | 5.18 ± 0.33           |
|                                  | Transwell | 5.84 ± 0.82           |
| Stimulated<br>PBMC               | Direct    | 17.67 ± 2.17          |
|                                  | Transwell | 13.92 ± 1.37          |
| Stimulated<br>ASC cocultures     | Direct    | 22.34 ± 4.79          |
|                                  | Transwell | 23.26 ± 4.33          |

**Table S2.** Percentages of CD4+CD25+ cells in the proliferated and not proliferated live fraction.

| Culture condition                |           | %CD4+CD25+<br>in proliferated | %CD4+CD25+<br>in not<br>proliferated |
|----------------------------------|-----------|-------------------------------|--------------------------------------|
| Not stimulated<br>PBMC           | Direct    | 15.37 ± 5.75                  | 4.08 ± 1.88                          |
|                                  | Transwell | 21.51 ± 8.92                  | 5.26 ± 1.42                          |
| Not stimulated<br>ASC cocultures | Direct    | 2.83 ± 2.5                    | 5.25 ± 0.63                          |
|                                  | Transwell | 10.41 ± 4.77                  | 6.36 ± 1.24                          |
| Stimulated<br>PBMC               | Direct    | 20.38 ± 3.16                  | 15.01 ± 0.21                         |
|                                  | Transwell | 15.33 ± 1.21                  | 14.30 ± 2.46                         |
| Stimulated<br>ASC cocultures     | Direct    | 35.41 ± 9.85                  | 20.26 ± 4.02                         |
|                                  | Transwell | 40.23 ± 2.61                  | 20.28 ± 1.67                         |

**Table S3.** Percentages of CD4+CD25+CD127/FoxP3 subpopulations within the Live population referring to graph in Figure 5A'.

| Culture condition                |           | %CD4+CD25+CD127/FoxP3 in Live |                         |                       |
|----------------------------------|-----------|-------------------------------|-------------------------|-----------------------|
|                                  |           | CD127-FoxP3+<br>(red)         | CD127+FoxP3-<br>(green) | CD127-FoxP3-<br>(blu) |
| Not stimulated<br>PBMC           | Direct    | 1.52 ± 0.24                   | 0.85 ± 0.33             | 3.14 ± 0.71           |
|                                  | Transwell | 1.79 ± 0.08                   | 1.27 ± 0.51             | 7.59 ± 2.70           |
| Not stimulated<br>ASC cocultures | Direct    | 2.07 ± 1.81                   | 1.89 ± 0.31             | 1.45 ± 0.26           |
|                                  | Transwell | 2.83 ± 0.37                   | 2.04 ± 0.43             | 2.26 ± 0.67           |
| Stimulated<br>PBMC               | Direct    | 2.83 ± 0.37                   | 3.86 ± 2.23             | 13.5 ± 0.92           |
|                                  | Transwell | 2.24 ± 0.17                   | 2.38 ± 1.34             | 9.24 ± 0.87           |
| Stimulated<br>ASC cocultures     | Direct    | 3.63 ± 0.68                   | 9.74 ± 2.40             | 7.84 ± 1.14           |
|                                  | Transwell | 3.11 ± 0.66                   | 10.43 ± 3.28            | 9.25 ± 0.71           |

**Table S4.** Percentage of CD4+CD25+CD127/FoxP3 in proliferated CD4+CD25+ cell fraction.

| Culture condition                |           | %CD4+CD25+CD127/FoxP3 in proliferated CD4+CD25+ |               |               |
|----------------------------------|-----------|-------------------------------------------------|---------------|---------------|
|                                  |           | CD127-FoxP3+                                    | CD127+FoxP3-  | CD127-FoxP3-  |
| Not stimulated<br>PBMC           | Direct    | 8.99 ± 2.86                                     | 18.51 ± 4.40  | 71.70 ± 7.53  |
|                                  | Transwell | 12.64 ± 3.92                                    | 13.19 ± 1.82  | 73.60 ± 5.34  |
| Not stimulated<br>ASC cocultures | Direct    | 32.77 ± 5.60                                    | 37.12 ± 3.43  | 28.69 ± 0.16  |
|                                  | Transwell | 18.07 ± 9.78                                    | 29.66 ± 1.84  | 51.42 ± 11.24 |
| Stimulated<br>PBMC               | Direct    | 13.55 ± 2.63                                    | 19.38 ± 10.29 | 66.80 ± 7.58  |
|                                  | Transwell | 16.69 ± 2.92                                    | 19.67 ± 7.99  | 63.30 ± 6.81  |
| Stimulated<br>ASC cocultures     | Direct    | 14.59 ± 2.86                                    | 44.03 ± 7.84  | 38.84 ± 8.96  |
|                                  | Transwell | 8.51 ± 1.28                                     | 53.84 ± 6.01  | 35.45 ± 7.32  |

**Table S5.** Percentage of CD4+CD25+CD127/FoxP3 in not proliferated CD4+CD25+ cell fraction.

| Culture condition                |           | %CD4+CD25+CD127/FoxP3 in not proliferated CD4+CD25+ |              |               |
|----------------------------------|-----------|-----------------------------------------------------|--------------|---------------|
|                                  |           | CD127-FoxP3+                                        | CD127+FoxP3- | CD127-FoxP3-  |
| Not stimulated<br>PBMC           | Direct    | 32.43 ± 2.50                                        | 13.63 ± 1.54 | 51.52 ± 3.76  |
|                                  | Transwell | 32.61 ± 6.19                                        | 11.96 ± 0.31 | 53.45 ± 5.93  |
| Not stimulated<br>ASC cocultures | Direct    | 33.80 ± 5.83                                        | 35.95 ± 9.54 | 28.61 ± 5.72  |
|                                  | Transwell | 30.53 ± 4.28                                        | 34.26 ± 2.59 | 32.61 ± 3.52  |
| Stimulated<br>PBMC               | Direct    | 19.73 ± 4.81                                        | 19.15 ± 6.02 | 59.65 ± 10.38 |
|                                  | Transwell | 16.97 ± 0.77                                        | 20.31 ± 2.73 | 61.32 ± 2.69  |
| Stimulated<br>ASC cocultures     | Direct    | 15.33 ± 3.51                                        | 46.23 ± 1.94 | 36.37 ± 2.46  |
|                                  | Transwell | 15.56 ± 2.63                                        | 42.80 ± 4.60 | 39.08 ± 5.01  |
